# Supplementary material for: The cold effect of ambient temperature on acute aortic dissection hospital admission: utilizing distributed lag nonlinear analysis
Source: Research Square preprint supplement (doi:10.21203/rs.3.rs-1634728/v1), 2022-05-27
Supplement: Supplementary file 1 [file 0c0efc9dd29ddf74ec24dccc.docx]

**Table S2** The lag effect between extremely low temperature and AAD admission (10th = 4°)

| **Single-day** | **total RR (95% CI)** | **Male**  **RR (95% CI)** | **Female**  **RR (95% CI)** | **< 55 years old** | **≥ 55 years old** | **Hypertension**  **(Yes)** | **Hypertension**  **(No)** |
| --- | --- | --- | --- | --- | --- | --- | --- |
| lag0 | 1.639(1.120,2.398) * | 1.802(1.172,2.773) * | 1.315(0.597，2.899) | 1.876(1.030,3.417) * | 1.512(0.923,2.476) | 1.637(1.079,2.484) * | 1.681(0.706,4.004) |
| lag1 | 1.233(1.078,1.410) * | 1.241(1.066,1.444) * | 1.242(0.940，1.641) | 1.329(1.076,1.641) * | 1.182(0.993,1.406) | 1.296(1.120,1.500) * | 0.994(0.724,1.365) |
| lag2 | 1.061(0.915,1.230) | 1.037(0.877,1.226) | 1.144(0.842，1.554) | 1.099(0.868,1.392) | 1.043(0.863,1.260) | 1.126(0.959,1.322) | 0.816(0.573,1.163) |
| lag3 | 1.015(0.909,1.132) | 1.004(0.887,1.136) | 1.044(0.831，1.311) | 1.028(0.863,1.225) | 1.010(0.878,1.162) | 1.055(0.936,1.188) | 0.853(0.657,1.107) |
| lag4 | 0.998(0.921,1.080) | 1.006(0.920,1.101) | 0.967(0.818，1.143) | 0.996(0.878,1.131) | 1.002(0.904,1.110) | 1.015(0.931,1.107) | 0.925(0.766,1.116) |
| lag5 | 0.985(0.910,1.066) | 1.007(0.920,1.101) | 0.914(0.774，1.080) | 0.973(0.858,1.102) | 0.995(0.899,1.102) | 0.986(0.905,1.075) | 0.979(0.812,1.180) |
| lag6 | 0.976(0.899,1.060) | 1.006(0.916,1.104) | 0.880(0.741，1.046) | 0.956(0.840,1.089) | 0.990(0.890,1.101) | 0.967(0.884,1.057) | 1.016(0.836,1.235) |
| lag7 | 0.969(0.895,1.050) | 1.004(0.917,1.099) | 0.860(0.728，1.015) | 0.944(0.833,1.071) | 0.986(0.890,1.093) | 0.954(0.875,1.040) | 1.038(0.859,1.256) |
| lag8 | 0.965(0.897,1.038) | 1.002(0.923,1.088) | 0.849(0.731，0.987) | 0.937(0.835,1.051) | 0.983(0.895,1.080) | 0.946(0.874,1.024) | 1.049(0.882,1.249) |
| lag9 | 0.962(0.902,1.027) | 1.000(0.928,1.076) | 0.845(0.739，0.967) | 0.933(0.841,1.034) | 0.981(0.902,1.067) | 0.942(0.877,1.011) | 1.054(0.902,1.231) |
| lag10 | 0.961(0.904,1.021) | 0.998(0.931,1.069) | 0.845(0.745，0.959) | 0.930(0.845,1.025) | 0.980(0.906,1.059) | 0.939(0.879,1.003) | 1.056(0.913,1.220) |
| lag11 | 0.960(0.905,1.019) | 0.996(0.931,1.066) | 0.847(0.747，0.960) | 0.929(0.845,1.022) | 0.979(0.906,1.057) | 0.938(0.879,1.001) | 1.057(0.917,1.219) |
| lag12 | 0.960(0.904,1.021) | 0.995(0.928,1.066) | 0.851(0.748，0.968) | 0.930(0.844,1.025) | 0.978(0.905,1.058) | 0.938(0.877,1.002) | 1.059(0.917,1.223) |
| lag13 | 0.961(0.903,1.023) | 0.994(0.926,1.066) | 0.857(0.751，0.979) | 0.932(0.843,1.030) | 0.979(0.903,1.060) | 0.938(0.876,1.004) | 1.061(0.916,1.229) |
| lag14 | 0.963(0.903,1.027) | 0.993(0.924,1.067) | 0.866(0.756，0.991) | 0.935(0.844,1.035) | 0.979(0.902,1.063) | 0.940(0.876,1.008) | 1.063(0.915,1.235) |
| lag15 | 0.965(0.905,1.030) | 0.993(0.923,1.068) | 0.876(0.763，1.004) | 0.939(0.847,1.041) | 0.980(0.902,1.065) | 0.942(0.878,1.011) | 1.065(0.916,1.238) |
| lag16 | 0.968(0.908,1.033) | 0.993(0.924,1.068) | 0.888(0.774，1.018) | 0.944(0.852,1.046) | 0.982(0.904,1.066) | 0.945(0.881,1.014) | 1.067(0.918,1.240) |
| lag17 | 0.972(0.912,1.035) | 0.993(0.925,1.067) | 0.901(0.788，1.031) | 0.950(0.859,1.051) | 0.984(0.907,1.067) | 0.949(0.886,1.017) | 1.069(0.922,1.239) |
| lag18 | 0.976(0.917,1.038) | 0.994(0.927,1.065) | 0.917(0.804，1.045) | 0.957(0.867,1.057) | 0.986(0.911,1.067) | 0.954(0.892,1.021) | 1.071(0.927,1.237) |
| lag19 | 0.980(0.923,1.041) | 0.995(0.930,1.064) | 0.934(0.823，1.060) | 0.965(0.877,1.062) | 0.989(0.915,1.067) | 0.959(0.898,1.024) | 1.073(0.933,1.233) |
| lag20 | 0.985(0.930,1.045) | 0.996(0.932,1.063) | 0.953(0.842，1.078) | 0.974(0.887,1.070) | 0.991(0.920,1.068) | 0.965(0.905,1.029) | 1.075(0.938,1.231) |
| lag21 | 0.991(0.935,1.050) | 0.997(0.934,1.064) | 0.973(0.861，1.099) | 0.984(0.897,1.079) | 0.995(0.924,1.071) | 0.972(0.912,1.035) | 1.077(0.942,1.231) |
| lag22 | 0.997(0.940,1.057) | 0.998(0.935,1.066) | 0.995(0.879，1.125) | 0.994(0.905,1.092) | 0.998(0.926,1.076) | 0.979(0.918,1.044) | 1.079(0.943,1.234) |
| lag23 | 1.003(0.943,1.066) | 1.000(0.933,1.071) | 1.018(0.894，1.158) | 1.005(0.910,1.109) | 1.002(0.926,1.083) | 0.986(0.922,1.055) | 1.081(0.939,1.243) |
| lag24 | 1.009(0.945,1.079) | 1.001(0.930,1.079) | 1.042(0.906，1.199) | 1.016(0.914,1.131) | 1.005(0.924,1.094) | 0.994(0.924,1.069) | 1.083(0.932,1.258) |
| lag25 | 1.016(0.945,1.093) | 1.003(0.924,1.089) | 1.068(0.914，1.247) | 1.028(0.914,1.157) | 1.009(0.920,1.108) | 1.002(0.924,1.086) | 1.085(0.920,1.279) |
| lag26 | 1.023(0.943,1.110) | 1.005(0.917,1.101) | 1.094(0.920，1.303) | 1.041(0.912,1.187) | 1.013(0.913,1.124) | 1.010(0.923,1.105) | 1.087(0.905,1.305) |
| lag27 | 1.03(0.940,1.129) | 1.007(0.909,1.115) | 1.122(0.923，1.365) | 1.053(0.909,1.221) | 1.018(0.906,1.143) | 1.019(0.921,1.127) | 1.089(0.887,1.336) |
| lag28 | 1.037(0.936,1.149) | 1.009(0.899,1.131) | 1.151(0.924，1.433) | 1.066(0.904,1.258) | 1.022(0.897,1.164) | 1.027(0.918,1.150) | 1.091(0.867,1.371) |
